# Supplementary material for: Extremely reduced supergroup F Wolbachia: transition to obligate insect symbionts
Source: bioRxiv or medRxiv preprint supplement (doi:10.1101/2021.10.15.464041), 2021-10-19
Supplement: Supplementary file [file media-5.pdf]

**Supplementary figure 1:** host phylogeny - relationships of *Menacathus eurysternus* samples. The sample used in this study for the metagenomic assembly printed in bold blue.

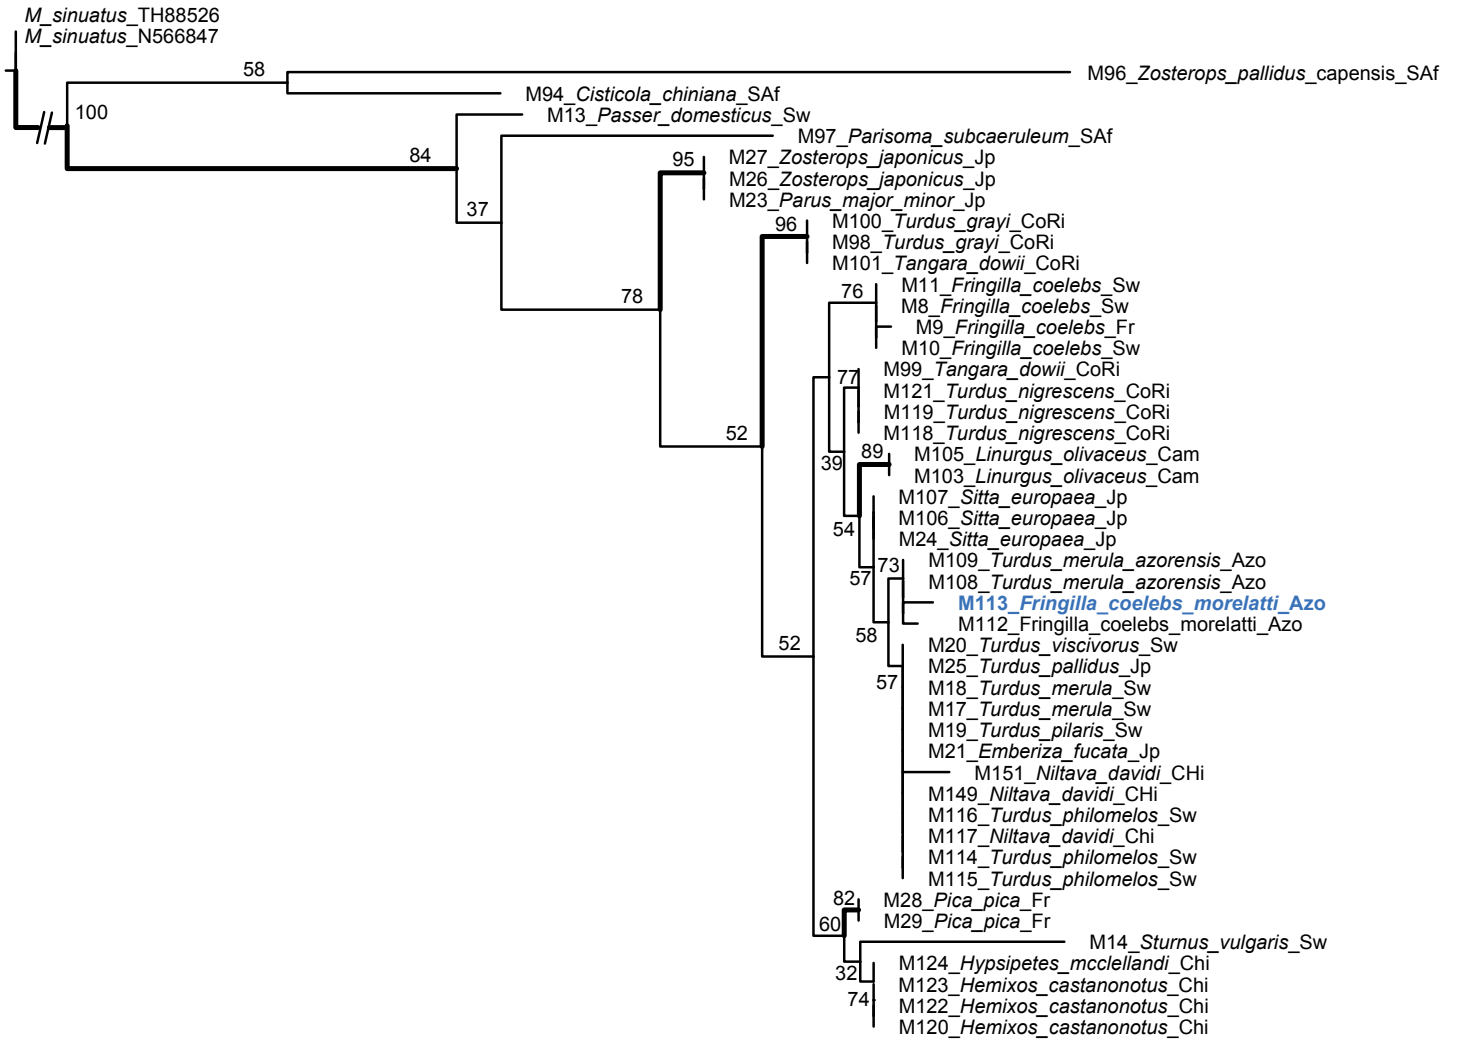

0.05
