# Supplementary material for: Extremely reduced supergroup F Wolbachia: transition to obligate insect symbionts
Source: bioRxiv or medRxiv preprint supplement (doi:10.1101/2021.10.15.464041), 2021-10-19

**Supplementary figure 2:** Compositional heat map for *M. eurysternus* microbiomes based on the strictly decontaminated 16S rRNA dataset (see Materials and Methods) rarefied at 1000 (A) and 2000 reads (B). The sample order reflects Figure 1 in the main manuscript. Additional information on the samples are found in Supplementary Data1.

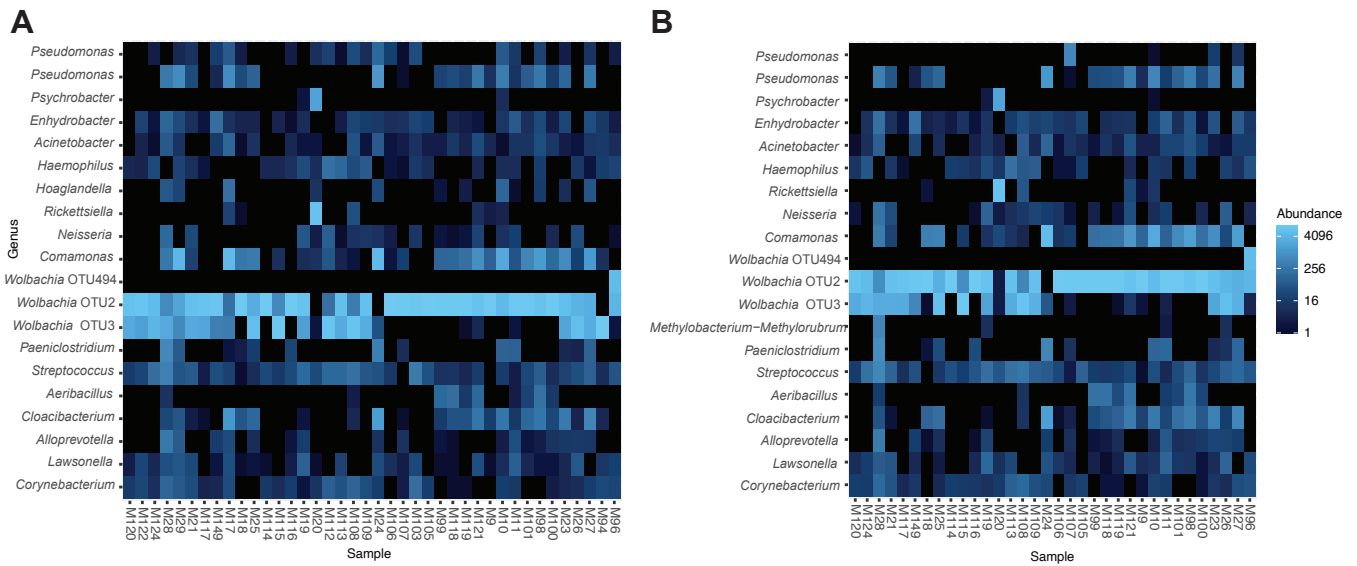

Supplement: Supplementary file [file media-6.pdf]
