# Supplementary material for: Extremely reduced supergroup F Wolbachia: transition to obligate insect symbionts
Source: bioRxiv or medRxiv preprint supplement (doi:10.1101/2021.10.15.464041), 2021-10-19

**Supplementary figure 4:** Phylogenetic trees derived from the multigene matrix by ML. The genomes assembled in this study printed in bold blue.

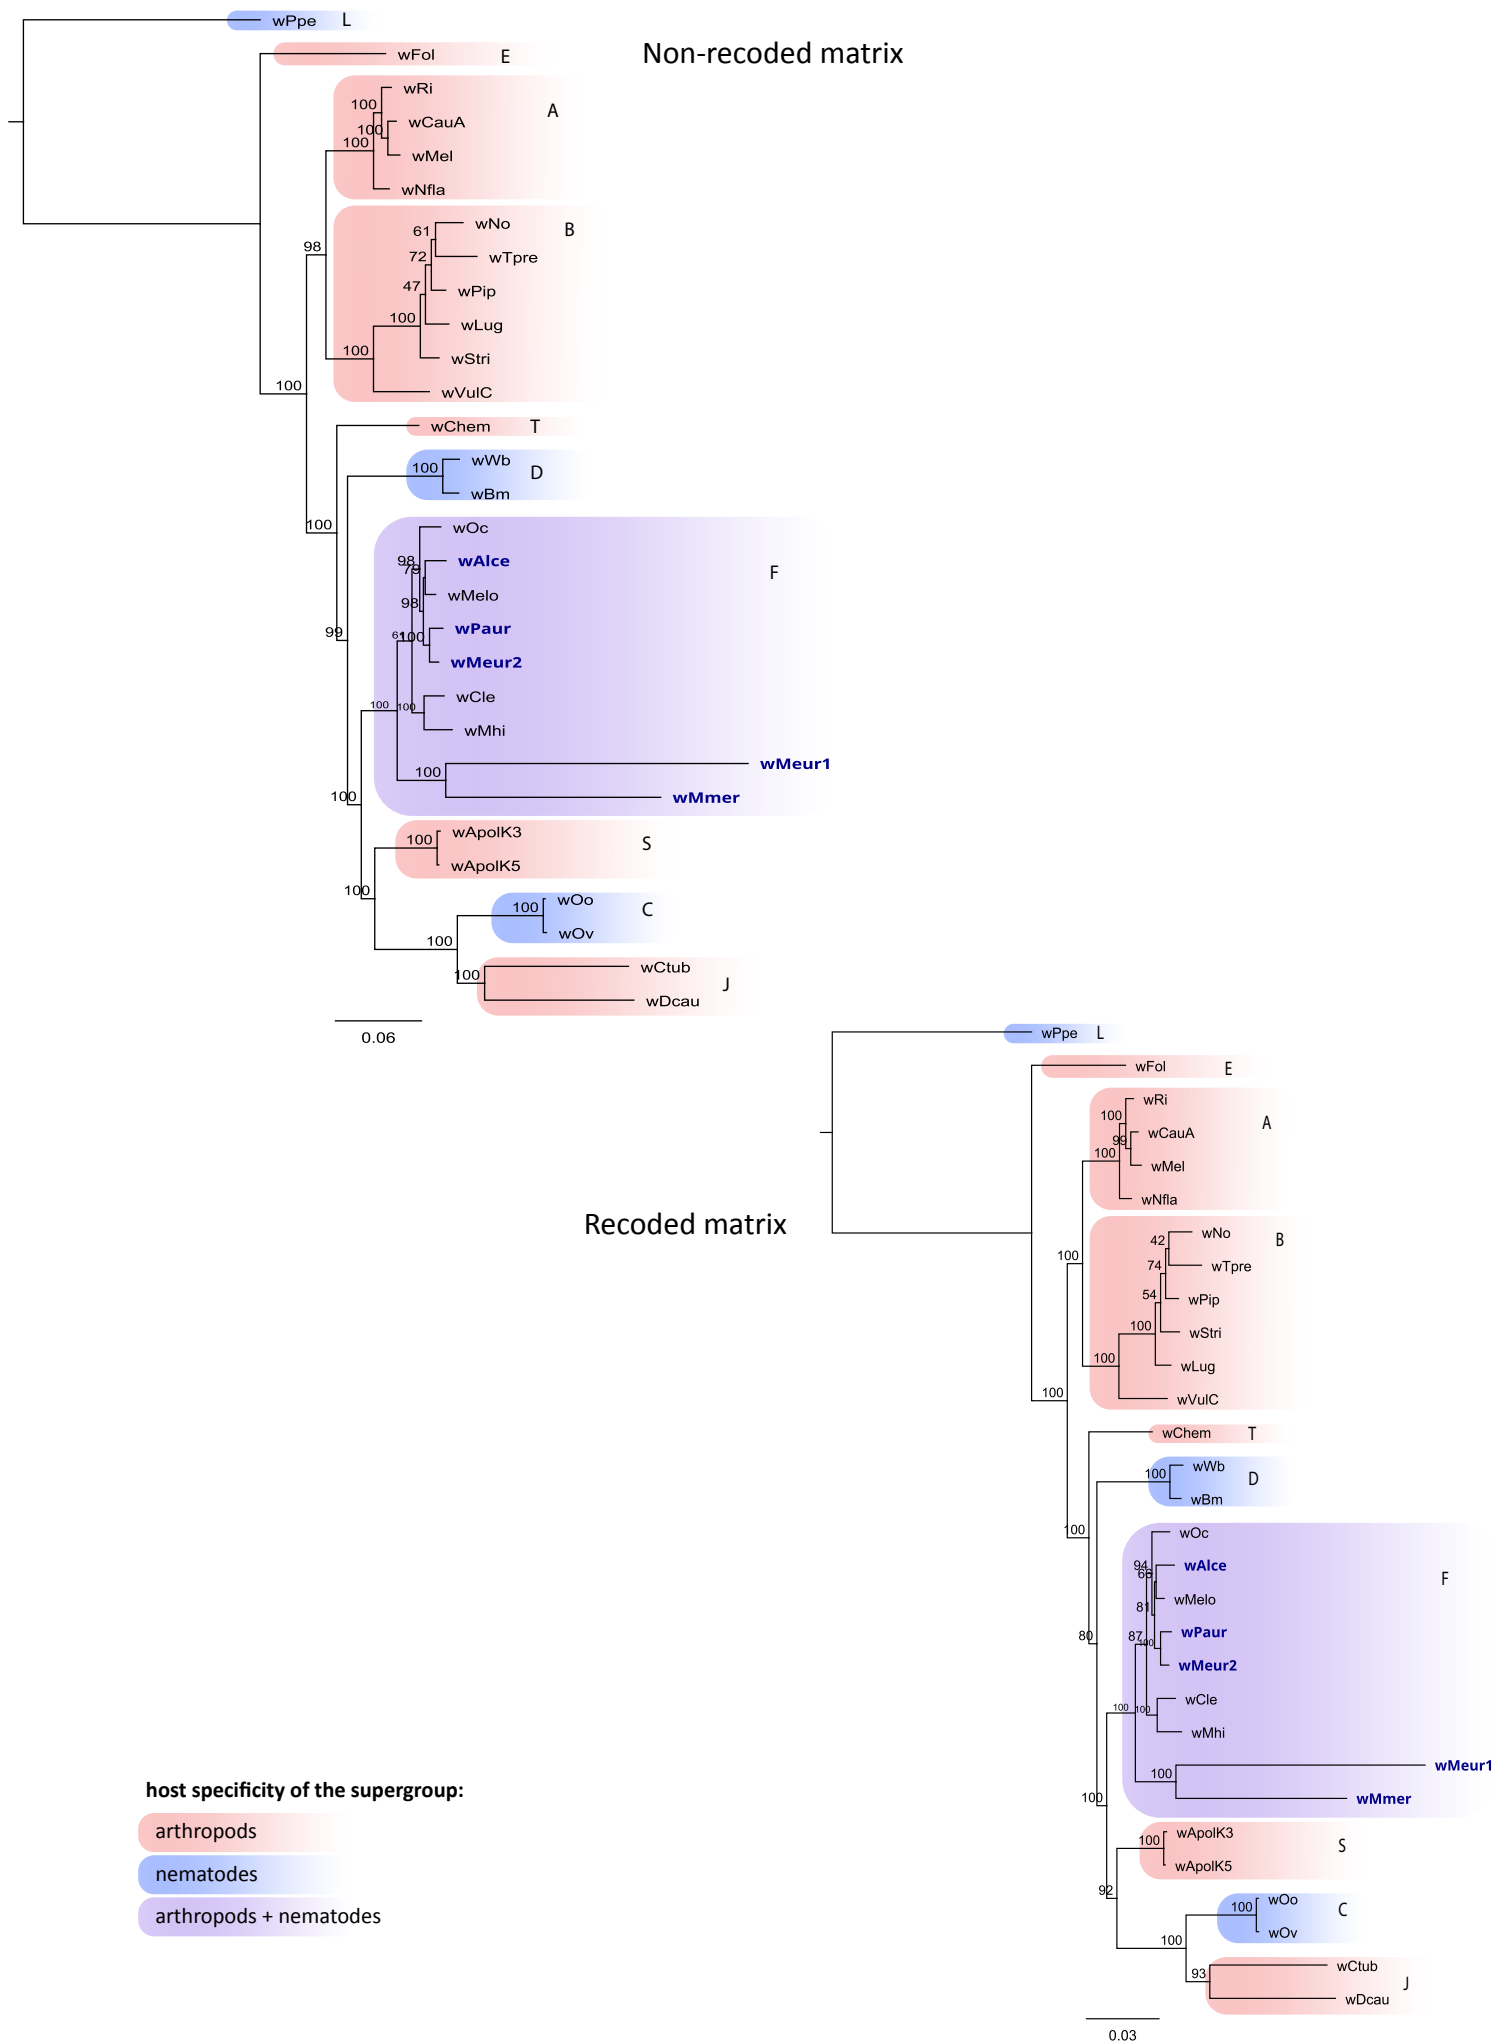

Supplement: Supplementary file [file media-8.pdf]
