# Supplementary material for: Extremely reduced supergroup F Wolbachia: transition to obligate insect symbionts
Source: bioRxiv or medRxiv preprint supplement (doi:10.1101/2021.10.15.464041), 2021-10-19

**Supplementary figure 5: Mauve synteny analysis.**

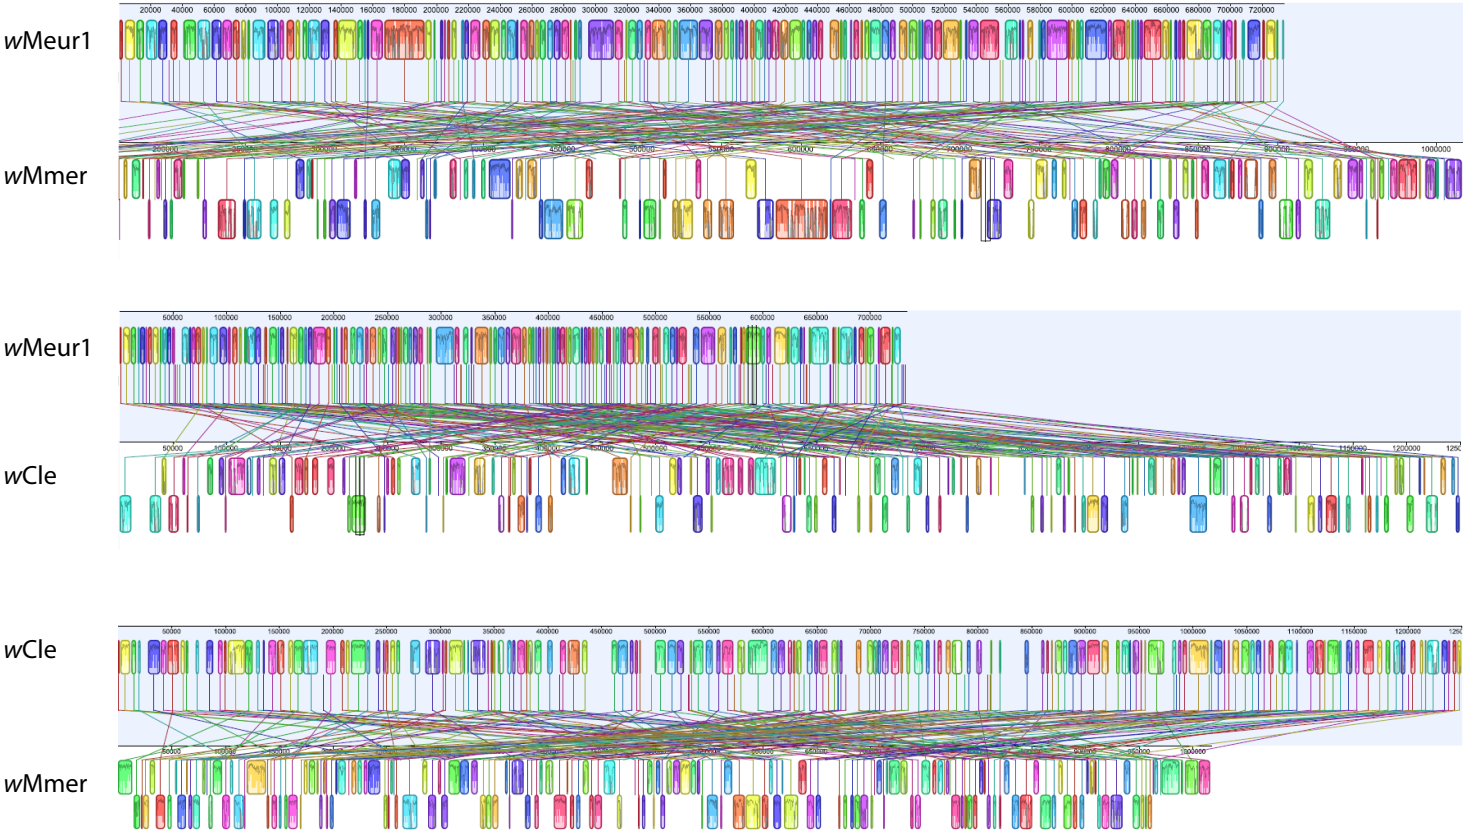

Supplement: Supplementary file [file media-9.pdf]
