# Supplementary material for: Extremely reduced supergroup F Wolbachia: transition to obligate insect symbionts
Source: bioRxiv or medRxiv preprint supplement (doi:10.1101/2021.10.15.464041), 2021-10-19
Supplement: Supplementary file [file media-10.pdf]

**Supplementary figure 6A:** Phylogenetic position of pantothenate synthesis related genes; Pantoate--beta-alanine ligase panC (EC 6.3.2.1)

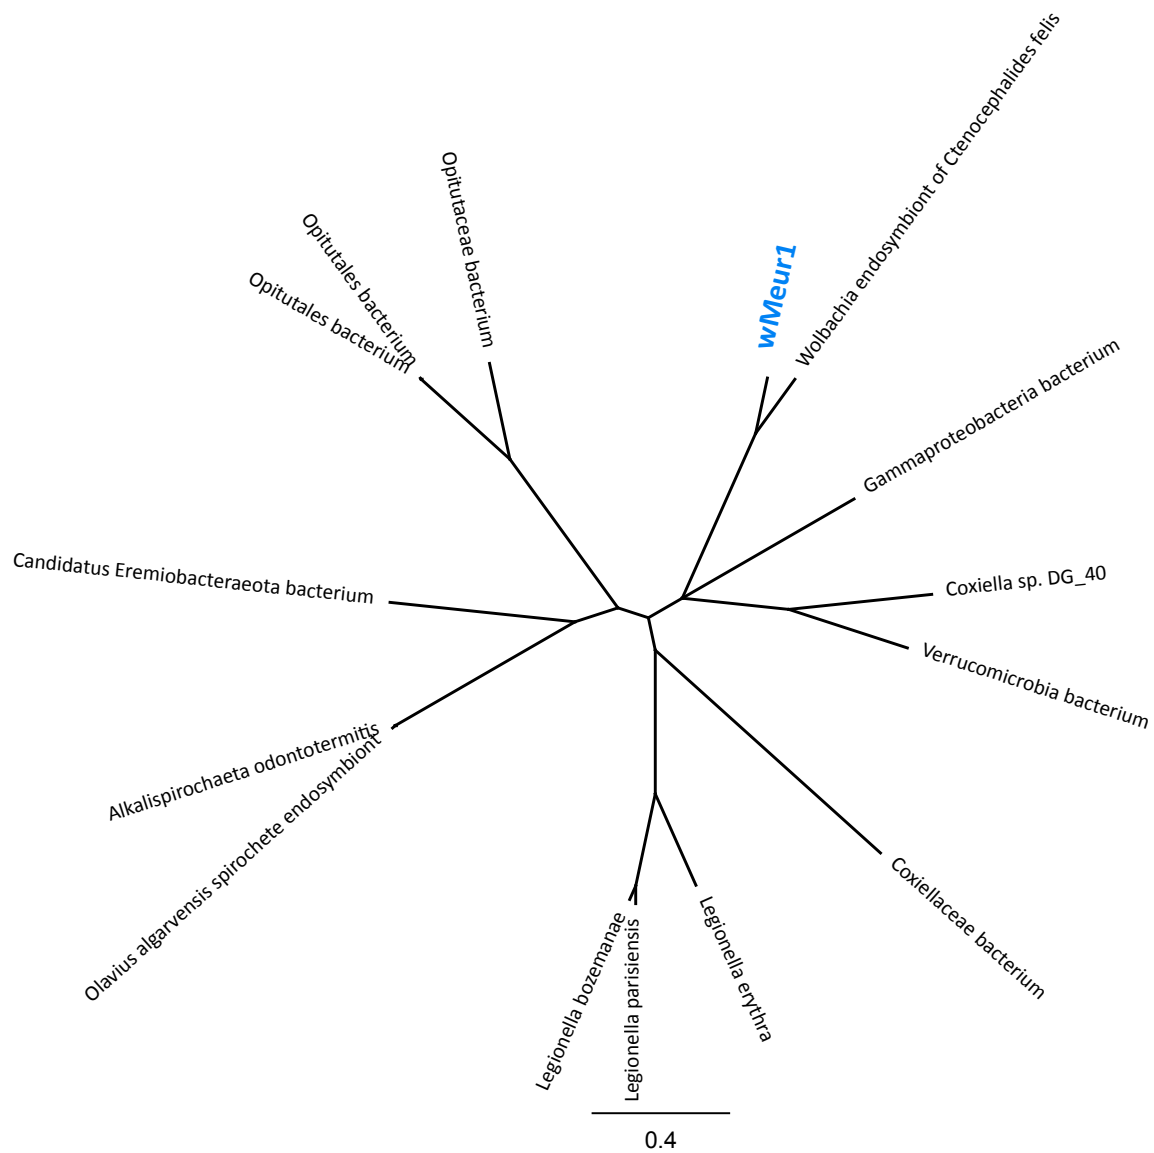

| Organism                                              | Name         |
|-------------------------------------------------------|--------------|
| Olavius algarvensis spirochete endosymbiont           | WP_124032323 |
| Alkalispirochaeta odontotermittis                     | WP_037564257 |
| Candidatus Eremiobacteraeota bacterium                | MBN9417370   |
| Opitutaceae bacterium                                 | MAM92216     |
| Opitutales bacterium                                  | MBT6769675   |
| Opitutales bacterium                                  | MBT3482533   |
| Coxiellaceae bacterium                                | MBV53023     |
| Legionella erythra                                    | WP_058527648 |
| Legionella parisiensis                                | WP_058516236 |
| Legionella bozemaniae                                 | WP_058458018 |
| Wolbachia endosymbiont of Ctenocephalides felis wCfeT | WP_168464627 |
| Gammaproteobacteria bacterium                         | MBI2790727   |
| Coxiella sp. DG_40                                    | KPJ67214     |
| Verrucomicrobia bacterium                             | PWU05281     |

**Supplementary figure 6B:** Phylogenetic position of pantothenate synthesis related genes; Ketopantoate reductase PanG (EC 1.1.1.169)

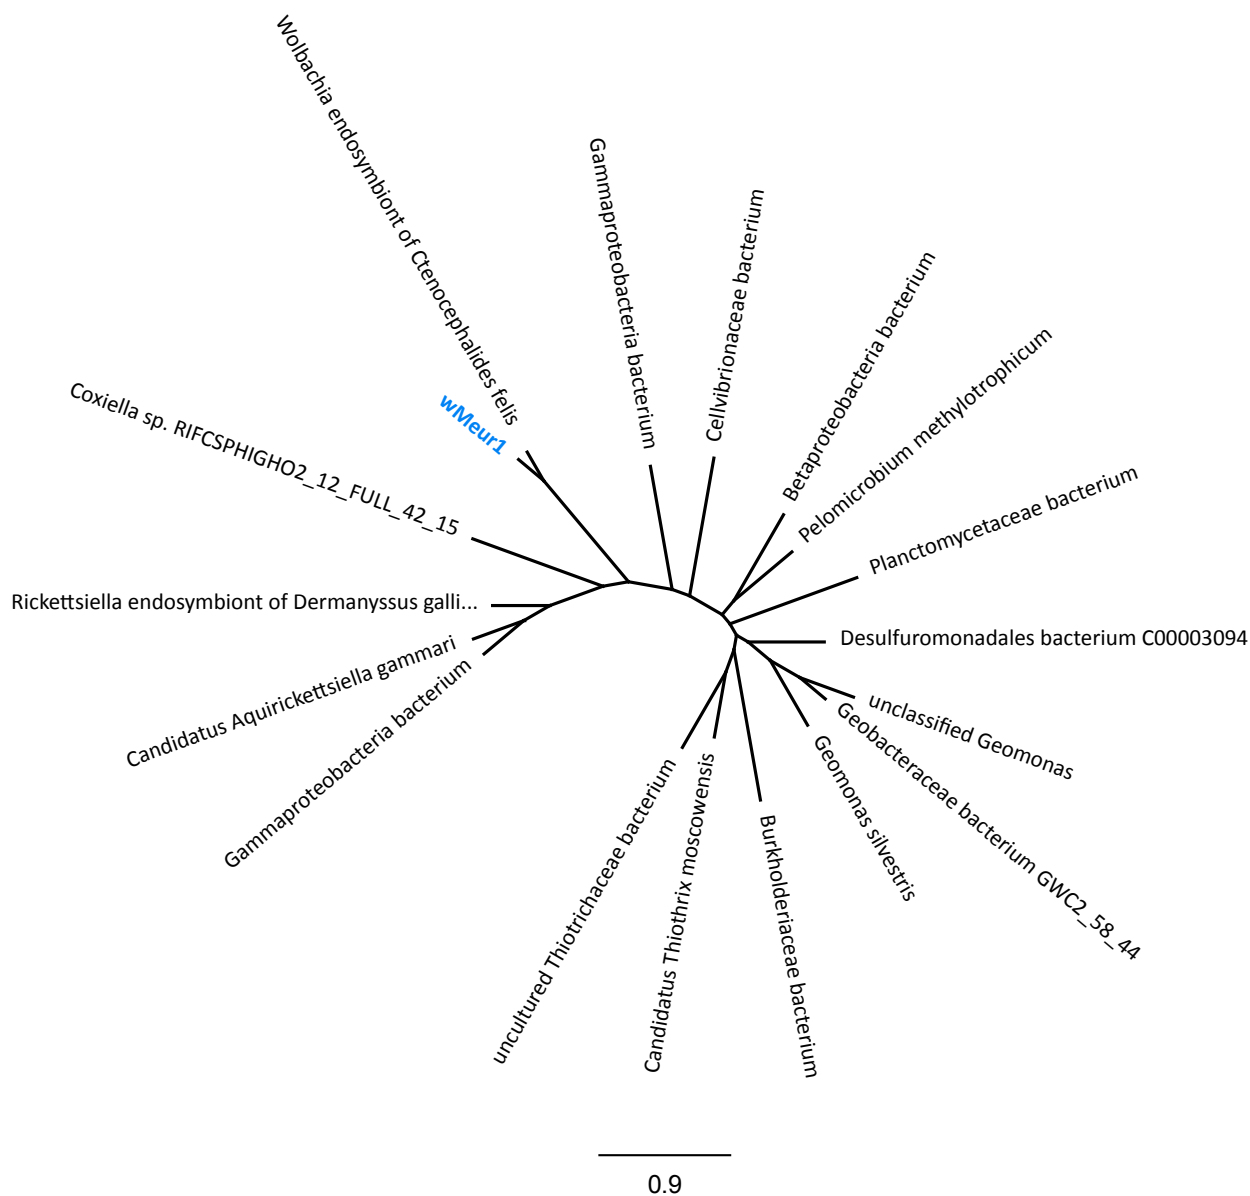

| Name                                                  | Accession    |
|-------------------------------------------------------|--------------|
| Gammaproteobacteria bacterium                         | TLY47062     |
| Candidatus Aquirickettsiella gammari                  | RDH40168     |
| Rickettsiella endosymbiont of Dermanyssus gallinae    | WP_218814024 |
| Wolbachia endosymbiont of Ctenocephalides felis wCfeT | WP_218938889 |
| Gammaproteobacteria bacterium                         | HBA33227     |
| Burkholderiaceae bacterium                            | MBV8634101   |
| Cellvibrionaceae bacterium                            | MAZ88707     |
| Planctomycetaceae bacterium                           | HID78016     |
| Betaproteobacteria bacterium                          | MBI1965041   |
| Pelomicrobium methylotrophicum                        | WP_147800823 |
| Desulfuromonadales bacterium C00003094                | OEU60518     |
| uncultured Thiotrichaceae bacterium                   | CAA6822986   |
| Candidatus Thiothrix moscowensis                      | MBJ6612093   |
| Geomonas silvestris                                   | WP_183355568 |
| Geobacteraceae bacterium GWC2_58_44                   | OGU05969     |
| unclassified Geomonas                                 | WP_217289478 |
| Coxiella sp. RIFCSPHIGHO2_12_FULL_42_15               | OGO93865     |

**Supplementary figure 6C:** Phylogenetic position of pantothenate synthesis related genes; 3-methyl-2-oxobutanoate hydroxymethyltransferase pan B (EC 2.1.2.11)

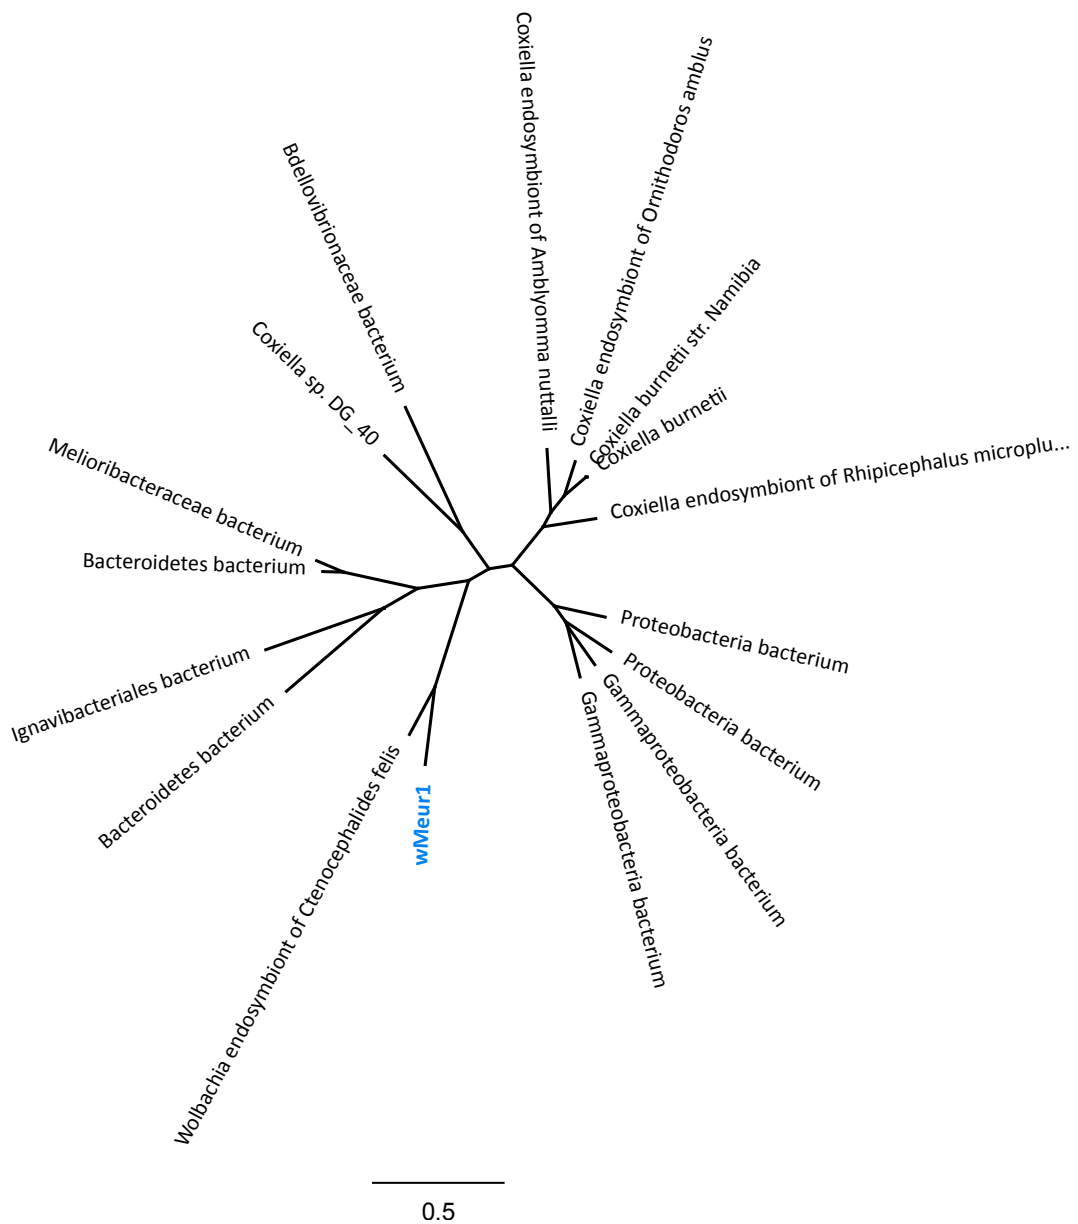

| Name                                                  | Accession    |
|-------------------------------------------------------|--------------|
| Bacteroidetes bacterium                               | MBU0473530   |
| Ignavibacteriales bacterium                           | MBN2571901   |
| Melioribacteraceae bacterium                          | KAB2839543   |
| Bacteroidetes bacterium                               | MBU2494347   |
| Wolbachia endosymbiont of Ctenocephalides felis wCfeT | WP_168464630 |
| Coxiella sp. DG_40                                    | KPJ67213     |
| Proteobacteria bacterium                              | MBS0288437   |
| Proteobacteria bacterium                              | MBS0287918   |
| Gammaproteobacteria bacterium                         | MBI2790726   |
| Gammaproteobacteria bacterium                         | MBN9286951   |
| Coxiella endosymbiont of Rhipicephalus microplus      | WP_102157157 |
| Coxiella endosymbiont of Amblyomma nuttalli           | WP_211923626 |
| Coxiella endosymbiont of Ornithodoros amblus          | MBW5802677   |
| Coxiella burnetii str. Namibia                        | AIT63869     |
| Coxiella burnetii                                     | WP_080744740 |
| Bdellovibrionaceae bacterium                          | MBT4762628   |
