# Supplementary material for: Extremely reduced supergroup F Wolbachia: transition to obligate insect symbionts
Source: bioRxiv or medRxiv preprint supplement (doi:10.1101/2021.10.15.464041), 2021-10-19
Supplement: Supplementary file [file media-11.pdf]

**Supplementary table 1:** SRA samples assembled and screened for *Wolbachia*. Highlighted by blue = positive screening resulting in new strains described in this study. Highlighted by grey = weak positive screening, not included into this study.

| SRA sample | Source                                 | Sub-order/Family          | Vertebrate host                 | strain |
|------------|----------------------------------------|---------------------------|---------------------------------|--------|
| SRR5308125 | <i>Heterodoxus spiniger</i>            | Amblycera/Boopidae        | <i>Canis lupus</i>              |        |
| SRR5308130 | <i>Macrogypus costalimai</i>           | Amblycera/Gyropidae       | <i>Cuniculus paca</i>           |        |
| SRR5308127 | <i>Laemobothrion tinnunculi</i>        | Amblycera/Laemobothriidae | <i>Falco longipennis</i>        |        |
| SRR5088470 | <i>Osborniella crotophagae</i>         | Amblycera/Menoponidae     | <i>Crotophaga ani</i>           |        |
| SRR5308132 | <i>Myrsidea</i> sp.                    | Amblycera/Menoponidae     | <i>Myiothlypis luteoviridis</i> |        |
| SRR8145978 | <i>Menopon gallinae</i>                | Amblycera/Menoponidae     | <i>Gallus gallus</i>            |        |
| SRR8334265 | <i>Meromenopon meropis</i>             | Amblycera/Menoponidae     | <i>Merops apiaster</i>          | w Mmer |
| SRR5308140 | <i>Ricinus</i> sp.                     | Amblycera/Ricinidae       | <i>Myiothlypis luteoviridis</i> |        |
| SRR5308146 | <i>Cummingsia maculata</i>             | Amblycera/Trimenoponidae  | <i>Lestoros inca</i>            |        |
| SRR5088466 | <i>Bothriometopus macrocnemis</i>      | Ischnocera/Philopteridae  | <i>Chauna torquata</i>          |        |
| SRR5308110 | <i>Alcedoecus</i> sp.                  | Ischnocera/Philopteridae  | <i>Halcyon badia</i>            | w Alce |
| SRR5308111 | <i>Anatoecus icterodes</i>             | Ischnocera/Philopteridae  | <i>Anas cyanoptera</i>          |        |
| SRR5308112 | <i>Brueelia antiqua</i>                | Ischnocera/Philopteridae  | <i>Catharus ustulatus</i>       |        |
| SRR5308113 | <i>Campanulotes compar</i>             | Ischnocera/Philopteridae  | <i>Columba livia</i>            |        |
| SRR5308114 | <i>Chelopistes texanus</i>             | Ischnocera/Philopteridae  | <i>Ortalis vetula</i>           |        |
| SRR5308115 | <i>Columbicola columbae</i>            | Ischnocera/Philopteridae  | <i>Columba livia</i>            |        |
| SRR5308116 | <i>Craspedonirmus immer</i>            | Ischnocera/Philopteridae  | <i>Gavia immer</i>              |        |
| SRR5308117 | <i>Docophoroides brevis</i>            | Ischnocera/Philopteridae  | <i>Diomedea exulans</i>         |        |
| SRR5308118 | <i>Falcolipeurus marginalis</i>        | Ischnocera/Philopteridae  | <i>Cathartes aura</i>           |        |
| SRR5308119 | <i>Fulicoffula longipila</i>           | Ischnocera/Philopteridae  | <i>Fulica americana</i>         |        |
| SRR5308120 | <i>Goniodes ortygis</i>                | Ischnocera/Philopteridae  | <i>Colinus virginianus</i>      |        |
| SRR5308124 | <i>Halipeurus diversus</i>             | Ischnocera/Philopteridae  | <i>Puffinus tenuirostris</i>    |        |
| SRR5308126 | <i>Ibidoecus bisignatus</i>            | Ischnocera/Philopteridae  | <i>Plegadis chihi</i>           |        |
| SRR5308131 | <i>Megaginus tataupensis</i>           | Ischnocera/Philopteridae  | <i>Crypturellus tataupa</i>     |        |
| SRR5308133 | <i>Osculotes curta</i>                 | Ischnocera/Philopteridae  | <i>Opisthocomus hoazin</i>      |        |
| SRR5308134 | <i>Oxylipeurus chiniri</i>             | Ischnocera/Philopteridae  | <i>Ortalis vetula</i>           |        |
| SRR5308135 | <i>Pectinopygus varius</i>             | Ischnocera/Philopteridae  | <i>Phalacrocorax varius</i>     |        |
| SRR5308137 | <i>Penenirmus auritus</i>              | Ischnocera/Philopteridae  | <i>Sphyrapicus varius</i>       | w Paur |
| SRR5308139 | <i>Quadriceps punctatus</i>            | Ischnocera/Philopteridae  | <i>Larus argentatus</i>         |        |
| SRR5308141 | <i>Saemundssonina lari</i>             | Ischnocera/Philopteridae  | <i>Larus novaehollandiae</i>    |        |
| SRR5308142 | <i>Strongylocotes lipogonus</i>        | Ischnocera/Philopteridae  | <i>Rhynchotus rufescens</i>     |        |
| SRR5308144 | <i>Trichophlopterus babakotophilus</i> | Ischnocera/Philopteridae  | <i>Propithecus verreauxi</i>    |        |
| SRR5308145 | <i>Pessoaiella absita</i>              | Ischnocera/Philopteridae  | <i>Opisthocomus hoazin</i>      |        |
| SRR1821919 | <i>Geomydoecus ewingi</i>              | Ischnocera/Trichodectidae | not provided                    |        |
| SRR5308121 | <i>Geomydoecus aurei</i>               | Ischnocera/Trichodectidae | <i>Thomomys bottae</i>          |        |
| SRR5308143 | <i>Stachiella larseni</i>              | Ischnocera/Trichodectidae | <i>Mustela vison</i>            |        |
