# Supplementary material for: Extremely reduced supergroup F Wolbachia: transition to obligate insect symbionts
Source: bioRxiv or medRxiv preprint supplement (doi:10.1101/2021.10.15.464041), 2021-10-19
Supplement: Supplementary file [file media-12.pdf]

**Supplementary table 2:** Busco evaluation of the genome's completeness; high level of duplication in wAlce highlighted by grey background.

**Rickettsia database**

wMeur1

C:85.7%[S:85.7%,D:0.0%],F:0.3%,M:14.0%,n:364  
 312 Complete BUSCOs (C)  
 312 Complete and single-copy BUSCOs (S)  
 0 Complete and duplicated BUSCOs (D)  
 1 Fragmented BUSCOs (F)  
 51 Missing BUSCOs (M)  
 364 Total BUSCO groups searched

wMmer

C:91.8%[S:91.8%,D:0.0%],F:0.3%,M:7.9%,n:364  
 334 Complete BUSCOs (C)  
 334 Complete and single-copy BUSCOs (S)  
 0 Complete and duplicated BUSCOs (D)  
 1 Fragmented BUSCOs (F)  
 29 Missing BUSCOs (M)  
 364 Total BUSCO groups searched

wMeur2

C:98.6%[S:98.6%,D:0.0%],F:0.3%,M:1.1%,n:364  
 359 Complete BUSCOs (C)  
 359 Complete and single-copy BUSCOs (S)  
 0 Complete and duplicated BUSCOs (D)  
 1 Fragmented BUSCOs (F)  
 4 Missing BUSCOs (M)  
 364 Total BUSCO groups searched

wPaur

C:97.0%[S:97.0%,D:0.0%],F:1.9%,M:1.1%,n:364  
 353 Complete BUSCOs (C)  
 353 Complete and single-copy BUSCOs (S)  
 0 Complete and duplicated BUSCOs (D)  
 7 Fragmented BUSCOs (F)  
 4 Missing BUSCOs (M)  
 364 Total BUSCO groups searched

wAlce

C:97.3%[S:61.0%,D:36.3%],F:2.2%,M:0.5%,n:364  
 354 Complete BUSCOs (C)  
 222 Complete and single-copy BUSCOs (S)  
 132 Complete and duplicated BUSCOs (D)  
 8 Fragmented BUSCOs (F)  
 2 Missing BUSCOs (M)  
 364 Total BUSCO groups searched

**Proteobacteria database**

wMeur1

C:68.5%[S:68.5%,D:0.0%],F:2.3%,M:29.2%,n:219  
 150 Complete BUSCOs (C)  
 150 Complete and single-copy BUSCOs (S)  
 0 Complete and duplicated BUSCOs (D)  
 5 Fragmented BUSCOs (F)  
 64 Missing BUSCOs (M)  
 219 Total BUSCO groups searched

wMmer

C:73.5%[S:73.5%,D:0.0%],F:2.3%,M:24.2%,n:219  
 161 Complete BUSCOs (C)  
 161 Complete and single-copy BUSCOs (S)  
 0 Complete and duplicated BUSCOs (D)  
 5 Fragmented BUSCOs (F)  
 53 Missing BUSCOs (M)  
 219 Total BUSCO groups searched

wMeur2

C:83.1%[S:83.1%,D:0.0%],F:1.8%,M:15.1%,n:219  
 182 Complete BUSCOs (C)  
 182 Complete and single-copy BUSCOs (S)  
 0 Complete and duplicated BUSCOs (D)  
 4 Fragmented BUSCOs (F)  
 33 Missing BUSCOs (M)  
 219 Total BUSCO groups searched

wPaur

C:82.2%[S:81.7%,D:0.5%],F:2.7%,M:15.1%,n:219  
 180 Complete BUSCOs (C)  
 179 Complete and single-copy BUSCOs (S)  
 1 Complete and duplicated BUSCOs (D)  
 6 Fragmented BUSCOs (F)  
 33 Missing BUSCOs (M)  
 219 Total BUSCO groups searched

wAlce

C:79.9%[S:51.1%,D:28.8%],F:4.6%,M:15.5%,n:219  
 175 Complete BUSCOs (C)  
 112 Complete and single-copy BUSCOs (S)  
 63 Complete and duplicated BUSCOs (D)  
 10 Fragmented BUSCOs (F)  
 34 Missing BUSCOs (M)  
 219 Total BUSCO groups searched
