# Supplementary material for: Extremely reduced supergroup F Wolbachia: transition to obligate insect symbionts
Source: bioRxiv or medRxiv preprint supplement (doi:10.1101/2021.10.15.464041), 2021-10-19
Supplement: Supplementary file [file media-13.pdf]

**Supplementary table 3:** Accessions numbers of the sequences used in phylogenetic and comparative analyses. Blue background = new strains from chewing lice. Green background = taxa included into the phylogenetic analyse (2 gene = fbpA\_coxA matrix, multigene = multigene matrix). SG = supergroup. \* = assembly done in this study based on the SRA data. MLST = genes retrieved from pubMLST database (see methods).

| 2 gene | multi gene | Host species                              | Host taxon          | Abbrev. | SG | Accession number        |          |          |      |      |
|--------|------------|-------------------------------------------|---------------------|---------|----|-------------------------|----------|----------|------|------|
|        |            |                                           |                     |         |    | NCBI                    |          |          | MLST |      |
|        |            |                                           |                     |         |    | SRA*/genome assembly    | fbpA     | coxA     | fbpA | coxA |
|        |            | <i>Alcedoecus</i> sp.                     | louse               | wAlce   | F  | SRR5308110*             |          |          |      |      |
|        |            | <i>Menacanthus eurysternus</i>            | louse               | wMeur1  | F  | BioProject: PRJNA768995 |          |          |      |      |
|        |            | <i>Menacanthus eurysternus</i>            | louse               | wMeur2  | F  | BioProject: PRJNA768995 |          |          |      |      |
|        |            | <i>Meromenopon meropis</i>                | louse               | wMmer   | F  | SRR8334265*             |          |          |      |      |
|        |            | <i>Penenirmus auritus</i>                 | louse               | wPa ur  | F  | SRR5308137*             |          |          |      |      |
|        |            | <i>Acisoma panorpoides panorpoides</i>    | dragonfly           |         | F  |                         | KC915265 | KC915236 |      |      |
|        |            | <i>Amblyomma americanum</i>               | tick                |         | F  |                         | HM061163 | HM061159 |      |      |
|        |            | <i>Anax guttatus</i>                      | dragonfly           |         | F  |                         | KC915285 | KC915256 |      |      |
|        |            | <i>Apilitermes longiceps</i>              | termites            |         | F  |                         | EF417907 | EF417914 |      |      |
|        |            | <i>Apoica</i> sp.                         | wasp                |         | F  |                         | EU126428 | EU126210 |      |      |
|        |            | <i>Armadillidium vulgare</i>              | carpenter bug       | wVulC   | B  | ALWU00000000            |          |          |      |      |
|        |            | <i>Atemnus politus</i>                    | pseudoscorpion      | wAPoK3  | S  | JAAXCS00000000          |          |          |      |      |
|        |            | <i>Atemnus politus</i>                    | pseudoscorpion      | wAPoK5  | S  | WQM000000000            |          |          |      |      |
|        |            | <i>Brachythemis contaminata</i>           | dragonfly           |         | F  |                         | KC915280 | KC915250 |      |      |
|        |            | <i>Brugia malayi</i>                      | filarial nematode   | wBm     | D  | NC_006833               |          |          |      |      |
|        |            | <i>Carposina sasakii</i>                  | moth                | wCa uA  | A  | NZ_CP041215             |          |          |      |      |
|        |            | <i>Cavitermes tuberosus</i>               | termites            |         | F  |                         | MF953231 | MF953228 |      |      |
|        |            | <i>Chorthippus parallelus</i>             | grasshopper         |         | F  |                         | JN698879 | JN698878 |      |      |
|        |            | <i>Chrysocoris stollii</i>                | jewel bugs          |         | F  |                         |          |          | 410  | 226  |
|        |            | <i>Cimex hemipterus</i>                   | bed bug             | wChem   | T  | NZ_CP061738             |          |          |      |      |
|        |            | <i>Cimex lectularius</i>                  | bed bug             | wCle    | F  | NZ_AP013028             |          |          |      |      |
|        |            | <i>Cimex lectularius</i>                  | bed bug             | wCle    | F  |                         | DQ842349 | DQ842275 |      |      |
|        |            | <i>Cruorifilaria tubero cauda</i>         | filarial nematode   | wCtub   | J  | CP046579                |          |          |      |      |
|        |            | <i>Ctenocephalides felis</i>              | flea                | wCfeJ   | ?  | NZ_CP051157             |          |          |      |      |
|        |            | <i>Ctenocephalides felis</i>              | flea                | wCfeT   | ?  | NZ_CP051156             |          |          |      |      |
|        |            | <i>Culex quinquefasciatus</i>             | mosquito            | wPi p   | B  | NC_010981               |          |          |      |      |
|        |            | <i>Dipetalonema caudispina</i>            | filarial nematode   | wDcau   | J  | CP046580                |          |          |      |      |
|        |            | <i>Diplacodes trivialis</i>               | dragonfly           |         | F  |                         | KC915276 | KC915246 |      |      |
|        |            | <i>Drosophila melanogaster</i>            | fly                 | wMel    | A  | NC_002978               |          |          |      |      |
|        |            | <i>Drosophila simulans</i>                | fly                 | wRi     | A  | NC_012416               |          |          |      |      |
|        |            | <i>Drosophila simulans</i>                | fly                 | wNo     | B  | NC_021084               |          |          |      |      |
|        |            | <i>Epophthalmia vittata</i>               | dragonfly           |         | F  |                         | KC915284 | KC915255 |      |      |
|        |            | <i>Folsomia candida</i>                   | springtail          | wFol    | E  | NZ_CP015510             |          |          |      |      |
|        |            | <i>Icosta</i> sp.                         | fly                 |         | F  |                         | MF461509 | MF461499 |      |      |
|        |            | <i>Ictinogomphus rapax</i>                | dragonfly           |         | F  |                         | KC915282 | KC915252 |      |      |
|        |            | <i>Laodelphax striatellus</i>             | planthopper         | wStri   | B  | MUIX00000000            |          |          |      |      |
|        |            | <i>Madathamugadia hiepei</i>              | filarial nematode   | wMhi    | F  | NZ_WQMP00000000         |          |          |      |      |
|        |            | <i>Madathamugadia hiepei</i>              | filarial nematode   | wMhi    | F  |                         | JQ888342 | JQ888307 |      |      |
|        |            | <i>Mansonella (Cutifilaria) perforata</i> | filarial nematode   |         | F  |                         | KU255337 | KU255278 |      |      |
|        |            | <i>Melophagus ovinus</i>                  | fly                 | wMelo   | F  | CACREU02                |          |          |      |      |
|        |            | <i>Mengenilla moldrzyki</i>               | Strepsiptera        | wMen    | F  | SRX095325*              |          |          |      |      |
|        |            | <i>Nasutitermes ephratae</i>              | termites            |         | F  |                         | KX036780 | KX024837 |      |      |
|        |            | <i>Nasutitermes itapocuensis</i>          | termites            |         | F  |                         | KX036782 | KX024839 |      |      |
|        |            | <i>Nasutitermes jaraguae</i>              | termites            |         | F  |                         | KX036784 | KX024841 |      |      |
|        |            | <i>Neotroponiscus carolii</i>             | Terrestrial isopods |         | F  |                         | KX036778 | KX024835 |      |      |
|        |            | <i>Neotroponiscus littoralis</i>          | Terrestrial isopods |         | F  |                         | KX036776 | KX024833 |      |      |
|        |            | <i>Nesobasis recava</i>                   | damsel flies        |         | F  |                         | MH291053 | MH290892 |      |      |
|        |            | <i>Nesobasis telegastrum</i>              | damsel flies        |         | F  |                         | MH291048 | MH290890 |      |      |
|        |            | <i>Neurothemis tullia</i>                 | dragonfly           |         | F  |                         | KC915283 | KC915254 |      |      |
|        |            | <i>Nilaparvata lugens</i>                 | planthopper         | wLug    | B  | MUIY01000000            |          |          |      |      |
|        |            | <i>Nomada flava</i>                       | bee                 | wNfla   | A  | NZ_LYUW00000000         |          |          |      |      |
|        |            | <i>Nycteribia kolenatii</i>               | fly                 |         | F  |                         | MF461503 | MF461494 |      |      |
|        |            | <i>Ocymyrmex picardi</i>                  | ant                 |         | F  |                         | EU127822 | EU127606 |      |      |
|        |            | <i>Odontotermes horni</i>                 | termites            |         | F  |                         | GQ422843 | GQ422835 |      |      |
|        |            | <i>Odontotermes</i> sp.                   | termites            |         | F  |                         | GQ422844 | GQ422836 |      |      |
|        |            | <i>Onchocerca ochengi</i>                 | filarial nematode   | wOo     | C  | NC_018267               |          |          |      |      |
|        |            | <i>Onchocerca volvulus</i>                | filarial nematode   | wOv     | C  | NZ_HG810405             |          |          |      |      |
|        |            | <i>Opisthophthalmus capensis</i>          | scorpions           |         | F  |                         |          |          | 31   | 30   |
|        |            | <i>Opisthophthalmus granifrons</i>        | scorpions           |         | F  |                         |          |          | 33   | 31   |
|        |            | <i>Opisthophthalmus littoralis</i>        | scorpions           |         | F  |                         |          |          | 57   | 56   |
|        |            | <i>Orthetrum glaucum</i>                  | dragonfly           |         | F  |                         | KC915286 | KC915257 |      |      |
|        |            | <i>Osmia caerulescens</i>                 | bee                 | wOc     | F  | SRR1221705*             | KP265901 |          |      |      |
|        |            | <i>Paratrechina longicornis</i>           | ant                 |         | F  |                         |          |          | 226  | 147  |
|        |            | <i>Pratylenchus penetrans</i>             | lesion nematodes    | wPpe    | L  | MJMG01000000            |          |          |      |      |
|        |            | <i>Procornitermes araujoi</i>             | termites            |         | F  |                         | KX036785 | KX024842 |      |      |
|        |            | <i>Procornitermes lesespii</i>            | termites            |         | F  |                         | KX036786 | KX024843 |      |      |
|        |            | <i>Pseudolychnia</i> sp.                  | fly                 |         | F  |                         | MF461506 | MF461497 |      |      |
|        |            | <i>Supella longipalpa</i>                 | cockroach           |         | F  |                         |          |          | 414  | 147  |
|        |            | <i>Teratodes monticolis</i>               | grasshopper         |         | F  |                         |          |          | 125  | 147  |
|        |            | <i>Trichogramma pretiosum</i>             | wasp                | wTpre   | B  | NZ_CM003641             |          |          |      |      |
|        |            | <i>Trithemis pallidinervis</i>            | dragonfly           |         | F  |                         | KC915267 | KC915237 |      |      |
|        |            | <i>Wuchereria bancrofti</i>               | filarial nematode   | wWb     | D  | NZ_NJBR00000000         |          |          |      |      |
|        |            | <i>Zelotes</i> sp.                        | spider              |         | F  |                         |          |          | 475  | 306  |
