# Supplementary material for: Extremely reduced supergroup F Wolbachia: transition to obligate insect symbionts
Source: bioRxiv or medRxiv preprint supplement (doi:10.1101/2021.10.15.464041), 2021-10-19
Supplement: Supplementary file [file media-14.pdf]

**Supplementary table 4:** Functional annotations of genes unique for a single genome. Highlighted by blue = new chewing lice strains. The three pantothenate related genes printed in bold blue.

|                                                                                 |
|---------------------------------------------------------------------------------|
| <b>wMeur1</b>                                                                   |
| <b>3-methyl-2-oxobutanoate_hydroxymethyltransferase_EC_2.1.2.11</b>             |
| <b>Ketopantoate_reductase_PanG_EC_1.1.1.169</b>                                 |
| <b>Pantoate--beta-alanine_ligase_EC_6.3.2.1</b>                                 |
| 34 hypothetical proteins                                                        |
| <b>wMmer</b>                                                                    |
| Uroporphyrinogen_III_decarboxylase_EC_4.1.1.37                                  |
| 82 hypothetical proteins                                                        |
| <b>wMeur2</b>                                                                   |
| Proton/glutamate_symport_protein_@_Sodium/glutamate_symport_protein             |
| 14 hypothetical proteins                                                        |
| <b>wPaur</b>                                                                    |
| GTP-binding_protein_Era                                                         |
| LSU_ribosomal_protein_L5p_L11e                                                  |
| 30 hypothetical proteins                                                        |
| <b>wAlce</b>                                                                    |
| Zinc_ABC_transporter_periplasmic-binding_protein_ZnuA                           |
| zinc_protease                                                                   |
| Arginyl-tRNA_synthetase_EC_6.1.1.19                                             |
| Malate_dehydrogenase_EC_1.1.1.37                                                |
| Phospholipase/carboxylesterase_family_protein_EC_3.1.-.-                        |
| tRNA_nucleotidyltransferase_EC_2.7.7.21_EC_2.7.7.25                             |
| Phosphoribosylformylglycinamide_cyclo-ligase_EC_6.3.3.1                         |
| 35 hypothetical proteins                                                        |
| <b>wCle</b>                                                                     |
| Hydroxyethylthiazole_kinase_EC_2.7.1.50                                         |
| Hydroxymethylpyrimidine_phosphate_kinase_ThiD_EC_2.7.4.7                        |
| 34 hypothetical protein                                                         |
| <b>wMelo</b>                                                                    |
| acetyltransferase_GNAT_family                                                   |
| 3-oxoacyl-[acyl-carrier_protein]_reductase_EC_1.1.1.100                         |
| ATP_synthase_delta_chain_EC_3.6.3.14                                            |
| Thioredoxin_reductase_EC_1.8.1.9                                                |
| 2_3_4_5-tetrahydropyridine-2_6-dicarboxylate_N-succinyltransferase_EC_2.3.1.117 |
| Phosphate_transport_system_permease_protein_PstC_TC_3.A.1.7.1                   |
| Ferric_iron_ABC_transporter_iron-binding_protein                                |
| wMelo_-_Lysyl-tRNA_synthetase_class_I_EC_6.1.1.6                                |
| D-alanine--D-alanine_ligase_EC_6.3.2.4                                          |
| DNA_polymerase_III_delta_prime_subunit_EC_2.7.7.7                               |
| Uroporphyrinogen-III_synthase_EC_4.2.1.75                                       |
| rRNA_small_subunit_methyltransferase_H                                          |
| 41 hypothetical proteins                                                        |
| <b>wMhi</b>                                                                     |
| Xaa-Pro_aminopeptidase_EC_3.4.11.9                                              |
| 34 hypothetical proteins                                                        |
| <b>wOc</b>                                                                      |
| Glycerol-3-phosphate_dehydrogenase_[NAD_P_+]_EC_1.1.1.94                        |
| Cytochrome_bd2_subunit_I                                                        |
| putative_Cytochrome_bd2_subunit_II                                              |
| Osmotically_inducibile_protein_Y_precursor                                      |
| 38 hypothetical proteins                                                        |
