# Supplementary material for: Extremely reduced supergroup F Wolbachia: transition to obligate insect symbionts
Source: bioRxiv or medRxiv preprint supplement (doi:10.1101/2021.10.15.464041), 2021-10-19
Supplement: Supplementary file [file media-15.pdf]

**Supplementary table 5: Overview of metabolic capacities - B vitamins and amino acids**

|                       |                  | wMeur1    | wMmer | wMeur2 | wPaur | wAlce | wCle | wMhi | wMelo | wOc | wCfeT | sCol |
|-----------------------|------------------|-----------|-------|--------|-------|-------|------|------|-------|-----|-------|------|
| B vitamins            | Thiamine         | iscS      |       |        |       |       |      |      |       |     |       |      |
|                       |                  | adk       |       |        |       |       |      |      |       |     |       |      |
|                       |                  | tenA      |       |        |       |       |      |      |       |     |       |      |
|                       | Riboflavin       | ribA      |       |        |       |       |      |      |       |     |       |      |
|                       |                  | ribD      |       |        |       |       |      |      |       |     |       |      |
|                       |                  | ribB      |       |        |       |       |      |      |       |     |       |      |
|                       |                  | ribH      |       |        |       |       |      |      |       |     |       |      |
|                       |                  | ribF      |       |        |       |       |      |      |       |     |       |      |
|                       |                  | ribE      |       |        |       |       |      |      |       |     |       |      |
|                       | Pyridoxine       | pdxJ      |       |        |       |       |      |      |       |     |       |      |
|                       |                  | pdxH      |       |        |       |       |      |      |       |     |       |      |
|                       | Folate           | folA/DHFR |       |        |       |       |      |      |       |     |       |      |
|                       |                  | folB      |       |        |       |       |      |      |       |     |       |      |
|                       |                  | folKP     |       |        |       |       |      |      |       |     |       |      |
|                       |                  | folC      |       |        |       |       |      |      |       |     |       |      |
|                       | Biotin           | bioA      |       |        |       |       |      |      |       |     |       |      |
|                       |                  | bioB      |       |        |       |       |      |      |       |     |       |      |
|                       |                  | bioC      |       |        |       |       |      |      |       |     |       |      |
|                       |                  | bioD      |       |        |       |       |      |      |       |     |       |      |
|                       |                  | bioF      |       |        |       |       |      |      |       |     |       |      |
| birA                  |                  |           |       |        |       |       |      |      |       |     |       |      |
| Pantothenate          | panB             |           |       |        |       |       |      |      |       |     |       |      |
|                       | panG             |           |       |        |       |       |      |      |       |     |       |      |
|                       | panC             |           |       |        |       |       |      |      |       |     |       |      |
|                       | panD             |           |       |        |       |       |      |      |       |     |       |      |
| Asparagine, Aspartate | ansA             |           |       |        |       |       |      |      |       |     |       |      |
|                       | argA             |           |       |        |       |       |      |      |       |     |       |      |
| Arginine              | argB             |           |       |        |       |       |      |      |       |     |       |      |
|                       | argC             |           |       |        |       |       |      |      |       |     |       |      |
|                       | argD             |           |       |        |       |       |      |      |       |     |       |      |
|                       | argG             |           |       |        |       |       |      |      |       |     |       |      |
|                       | argF (argI, OTC) |           |       |        |       |       |      |      |       |     |       |      |
|                       | argJ             |           |       |        |       |       |      |      |       |     |       |      |
|                       | argH             |           |       |        |       |       |      |      |       |     |       |      |
|                       | aspC             |           |       |        |       |       |      |      |       |     |       |      |
| Phenylalanine         | pheA             |           |       |        |       |       |      |      |       |     |       |      |
|                       | aspC             |           |       |        |       |       |      |      |       |     |       |      |
| Tryptophan            | trpD             |           |       |        |       |       |      |      |       |     |       |      |
|                       | trpG             |           |       |        |       |       |      |      |       |     |       |      |
|                       | trpC             |           |       |        |       |       |      |      |       |     |       |      |
|                       | trpA             |           |       |        |       |       |      |      |       |     |       |      |
|                       | trpF             |           |       |        |       |       |      |      |       |     |       |      |
|                       | trpB             |           |       |        |       |       |      |      |       |     |       |      |
| Sulphate, cysteine    | cysN             |           |       |        |       |       |      |      |       |     |       |      |
|                       | cysD             |           |       |        |       |       |      |      |       |     |       |      |
|                       | cysC             |           |       |        |       |       |      |      |       |     |       |      |
|                       | cysH             |           |       |        |       |       |      |      |       |     |       |      |
|                       | cysI             |           |       |        |       |       |      |      |       |     |       |      |
|                       | cysJ             |           |       |        |       |       |      |      |       |     |       |      |
|                       | cysQ             |           |       |        |       |       |      |      |       |     |       |      |
|                       | cysE             |           |       |        |       |       |      |      |       |     |       |      |
|                       | cysK             |           |       |        |       |       |      |      |       |     |       |      |
| Methionine            | metA             |           |       |        |       |       |      |      |       |     |       |      |
|                       | metB             |           |       |        |       |       |      |      |       |     |       |      |
|                       | metC             |           |       |        |       |       |      |      |       |     |       |      |
|                       | metE             |           |       |        |       |       |      |      |       |     |       |      |
| Lysine                | asd              |           |       |        |       |       |      |      |       |     |       |      |
|                       | dapA             |           |       |        |       |       |      |      |       |     |       |      |
|                       | dapB             |           |       |        |       |       |      |      |       |     |       |      |
|                       | dapD             |           |       |        |       |       |      |      |       |     |       |      |
|                       | dapE             |           |       |        |       |       |      |      |       |     |       |      |
|                       | dapF             |           |       |        |       |       |      |      |       |     |       |      |
|                       | lysA             |           |       |        |       |       |      |      |       |     |       |      |
|                       | thrA             |           |       |        |       |       |      |      |       |     |       |      |
| Threonine             | thrB             |           |       |        |       |       |      |      |       |     |       |      |
|                       | thrC             |           |       |        |       |       |      |      |       |     |       |      |
| Leucine               | leuA             |           |       |        |       |       |      |      |       |     |       |      |
|                       | leuC             |           |       |        |       |       |      |      |       |     |       |      |
|                       | leuD             |           |       |        |       |       |      |      |       |     |       |      |
|                       | leuB             |           |       |        |       |       |      |      |       |     |       |      |
| Glycine               | glyA             |           |       |        |       |       |      |      |       |     |       |      |
| Histidine             | hisA             |           |       |        |       |       |      |      |       |     |       |      |
|                       | hisB             |           |       |        |       |       |      |      |       |     |       |      |
|                       | hisC             |           |       |        |       |       |      |      |       |     |       |      |
|                       | hisD             |           |       |        |       |       |      |      |       |     |       |      |
|                       | hisF             |           |       |        |       |       |      |      |       |     |       |      |
|                       | hisG             |           |       |        |       |       |      |      |       |     |       |      |
|                       | hisH             |           |       |        |       |       |      |      |       |     |       |      |
| Serine                | serC             |           |       |        |       |       |      |      |       |     |       |      |

present absent

**Supplementary table 5:** Overview of metabolic capacities - secretion systems and ABC transporters

|                                     | wMeur1                              | wMmer | wMeur2 | wPaur | wAlce | wCle | wMhi | wMelo | wOc | wCfeT | sCol |
|-------------------------------------|-------------------------------------|-------|--------|-------|-------|------|------|-------|-----|-------|------|
| <b>secretion system</b>             | Type I - tolC                       |       |        |       |       |      |      |       |     |       |      |
|                                     | Type II - gspD                      |       |        |       |       |      |      |       |     |       |      |
|                                     | Sec-SRP - secA                      |       |        |       |       |      |      |       |     |       |      |
|                                     | Sec-SRP - secB                      |       |        |       |       |      |      |       |     |       |      |
|                                     | Sec-SRP - secD                      |       |        |       |       |      |      |       |     |       |      |
|                                     | Sec-SRP - secF                      |       |        |       |       |      |      |       |     |       |      |
|                                     | Sec-SRP - secG                      |       |        |       |       |      |      |       |     |       |      |
|                                     | Sec-SRP - secY                      |       |        |       |       |      |      |       |     |       |      |
|                                     | Sec-SRP - YajC                      |       |        |       |       |      |      |       |     |       |      |
|                                     | Sec-SRP - YidC                      |       |        |       |       |      |      |       |     |       |      |
|                                     | Sec-SRP - ftsY                      |       |        |       |       |      |      |       |     |       |      |
|                                     | Sec-SRP - ffh                       |       |        |       |       |      |      |       |     |       |      |
|                                     | secE                                |       |        |       |       |      |      |       |     |       |      |
|                                     | Twin arginine targeting - Tata      |       |        |       |       |      |      |       |     |       |      |
|                                     | Twin arginine targeting - TatC      |       |        |       |       |      |      |       |     |       |      |
|                                     | Type IV - virB10                    |       |        |       |       |      |      |       |     |       |      |
|                                     | virB3                               |       |        |       |       |      |      |       |     |       |      |
|                                     | virB4                               |       |        |       |       |      |      |       |     |       |      |
|                                     | virB9                               |       |        |       |       |      |      |       |     |       |      |
|                                     | virB6                               |       |        |       |       |      |      |       |     |       |      |
| virB8                               |                                     |       |        |       |       |      |      |       |     |       |      |
| virB11                              |                                     |       |        |       |       |      |      |       |     |       |      |
| virD4                               |                                     |       |        |       |       |      |      |       |     |       |      |
| <b>ABC transporters</b>             | CcmA                                |       |        |       |       |      |      |       |     |       |      |
|                                     | CcmB                                |       |        |       |       |      |      |       |     |       |      |
|                                     | CcmC                                |       |        |       |       |      |      |       |     |       |      |
|                                     | haem exporter - PstA                |       |        |       |       |      |      |       |     |       |      |
|                                     | haem exporter - PstB                |       |        |       |       |      |      |       |     |       |      |
|                                     | haem exporter - PstC                |       |        |       |       |      |      |       |     |       |      |
|                                     | haem exporter - PstS                |       |        |       |       |      |      |       |     |       |      |
|                                     | phosphate trasport system - lolC_E  |       |        |       |       |      |      |       |     |       |      |
|                                     | phosphate trasport system - lolD    |       |        |       |       |      |      |       |     |       |      |
|                                     | lioprotein releasing systme - ZnuA  |       |        |       |       |      |      |       |     |       |      |
|                                     | lioprotein releasing systme - ZnuB  |       |        |       |       |      |      |       |     |       |      |
|                                     | lioprotein releasing systme - ZnuC  |       |        |       |       |      |      |       |     |       |      |
|                                     | zinc transport system - BioY        |       |        |       |       |      |      |       |     |       |      |
|                                     | biotin trasport system - AfuA       |       |        |       |       |      |      |       |     |       |      |
|                                     | biotin trasport system - AfuB       |       |        |       |       |      |      |       |     |       |      |
|                                     | biotin trasport system - AfuC       |       |        |       |       |      |      |       |     |       |      |
|                                     | phospholipid trasport system - MlaC |       |        |       |       |      |      |       |     |       |      |
| phospholipid trasport system - MlaD |                                     |       |        |       |       |      |      |       |     |       |      |
| phospholipid trasport system - MlaE |                                     |       |        |       |       |      |      |       |     |       |      |
| phospholipid trasport system - MlaF |                                     |       |        |       |       |      |      |       |     |       |      |

present absent
